# Supplementary material for: Understanding the mechanism of water splitting on (111) and (001) surfaces of CsPbI 2 Br: time-domain ab initio analysis and DFT study
Source: Royal Society of Chemistry journal article supplement (doi:10.1039/d4ra08275c), 2025-01-01
Supplement: d4ra08275c1.pdf [file d4ra08275c1.pdf]

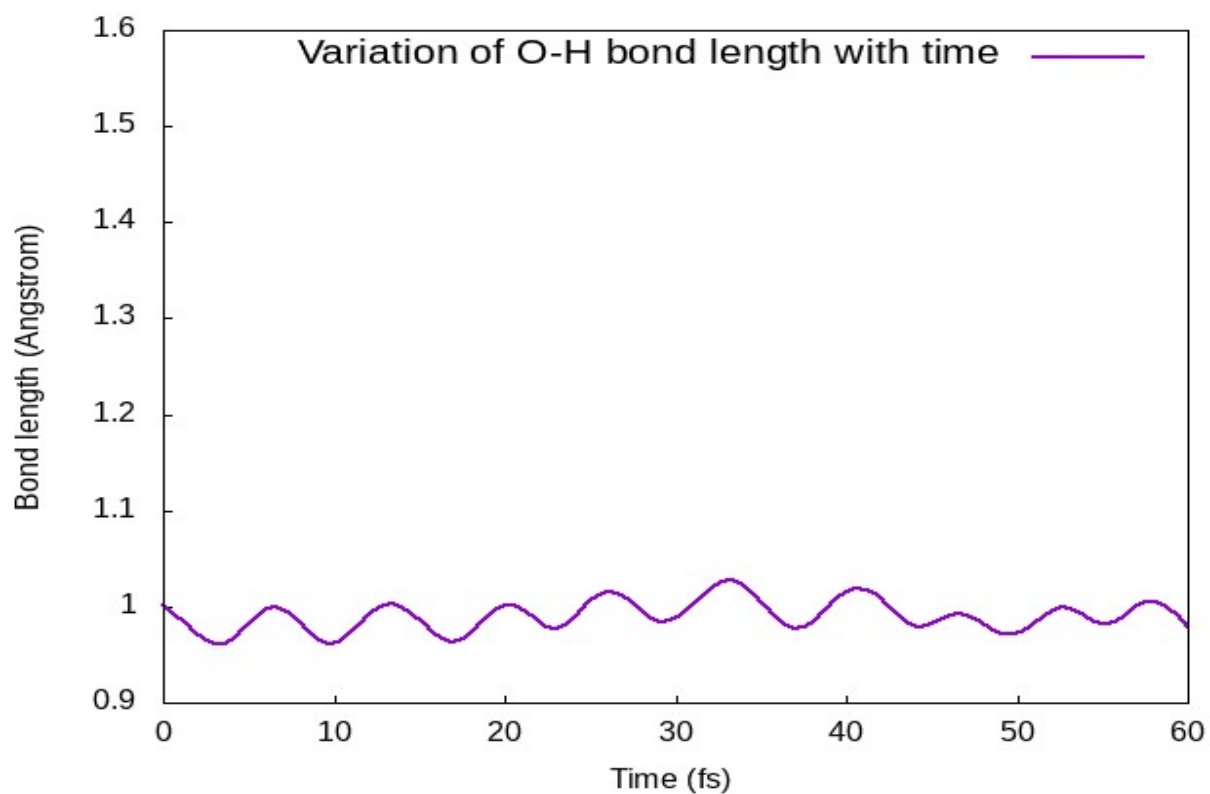

Fig. S1 Time evolution of the O-H distance of water molecule on (001) CsPbI<sub>2</sub>Br/H<sub>2</sub>O interface.

(a)

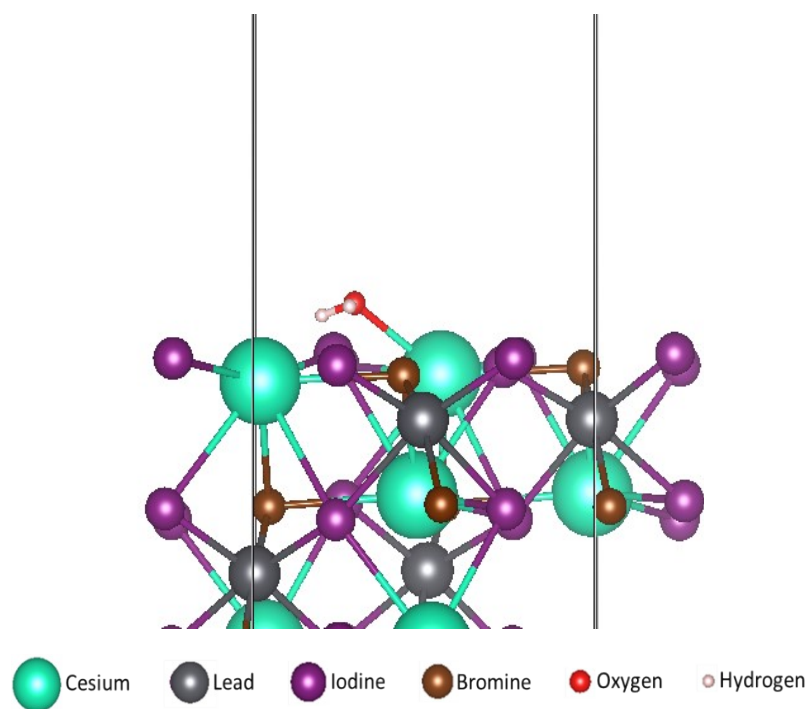

(b)

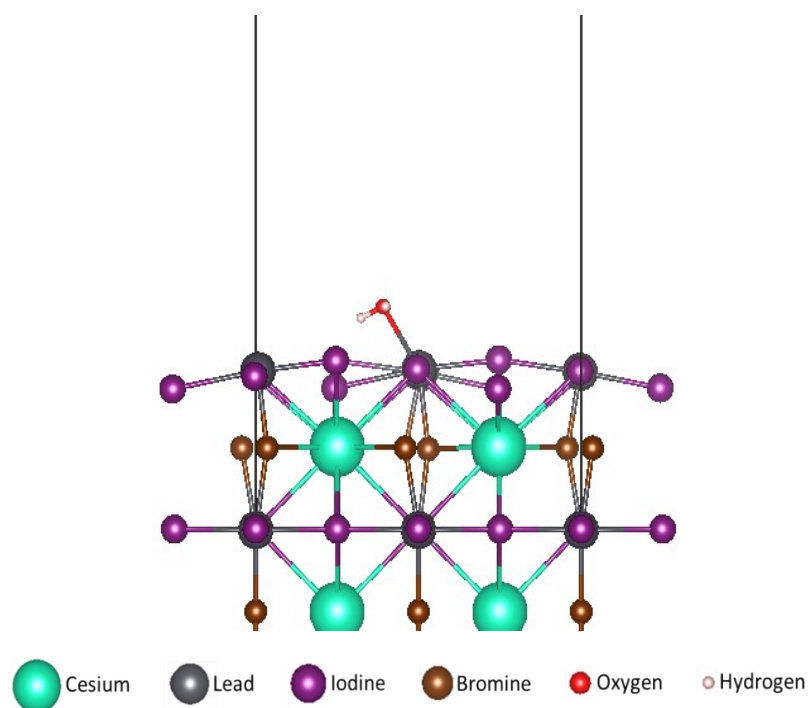

Fig S2: Water adsorption on the (a) (111) and (b) 001 surface of CsPbI<sub>2</sub>Br

(a)

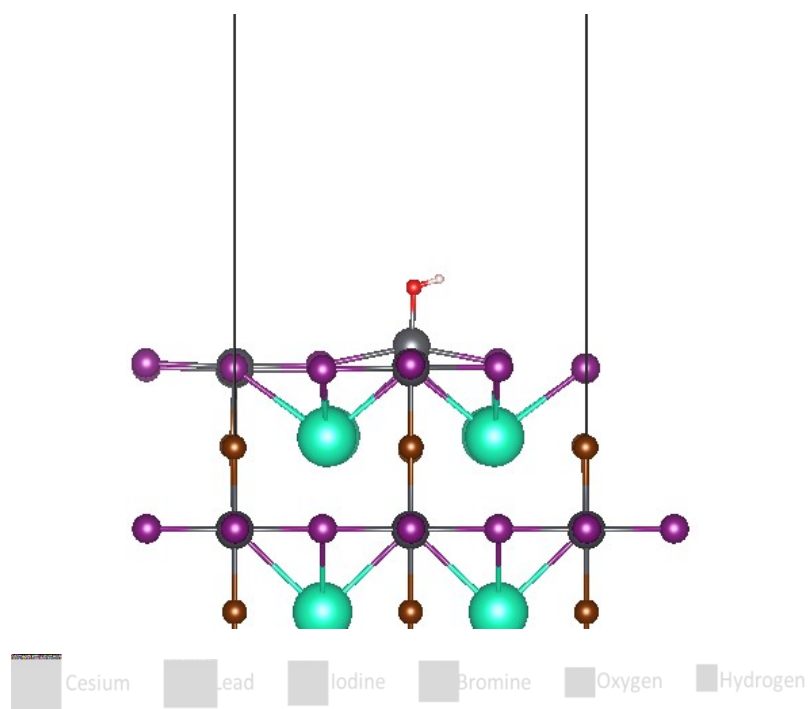

(b)

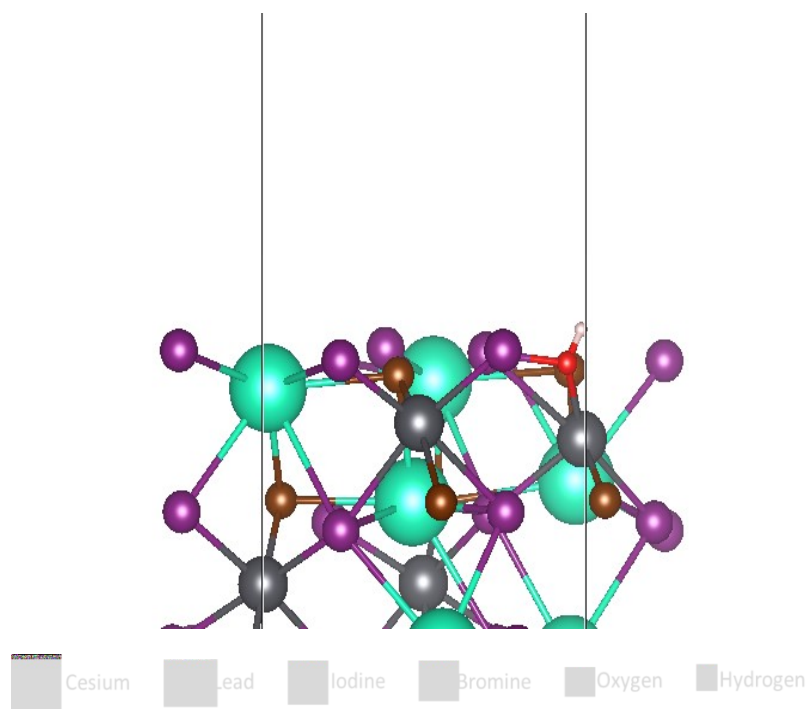

Fig S3 OH<sup>-</sup> adsorbed on the (a) (001) surface of CsPbI<sub>2</sub>Br and (b) (111) surface of CsPbI<sub>2</sub>Br

(a)

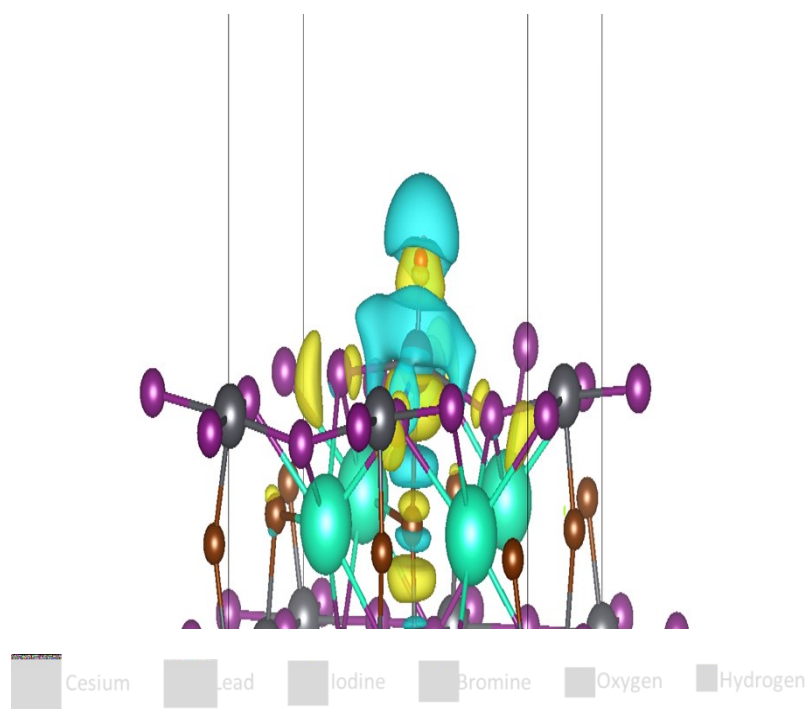

(b)

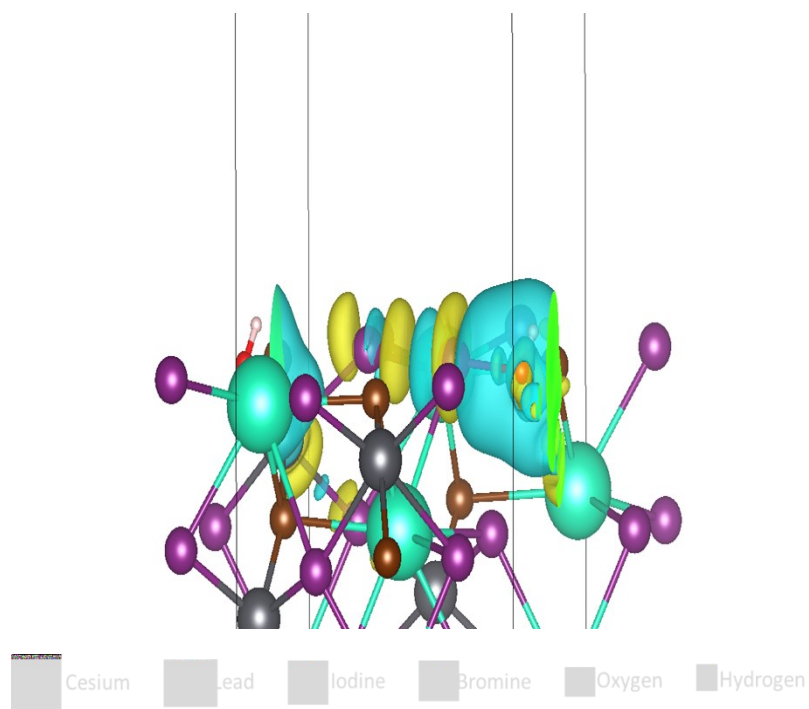

Fig S4 Charge density difference (CDD) plots of OH<sup>-</sup> on (a) (001) plane of CsPbI<sub>2</sub>Br and (b) (111) plane of CsPbI<sub>2</sub>Br
